# Supplementary material for: Influence of Land Use and Topographic Factors on Soil Organic Carbon Stocks and Their Spatial and Vertical Distribution
Source: MDPI journal article supplement (doi:10.3390/rs14122846), 2022-06-14
Supplement: s1 [file s1]

**Table S1.** SOC stocks comparisons between soil horizons by land use land cover (LULC) and between LULC by Soil Horizon.

| Land Use      | Soil Horizon Comparisons by LULC |             |          |
|---------------|----------------------------------|-------------|----------|
|               | Ap vs Bt                         | Ap vs BC    | Bt vs BC |
| Prairie Grass | <0.001 (Ap)                      | <0.001 (Ap) | 0.684    |
| Lawn Grass    | 0.089                            | 0.022 (Ap)  | 0.16     |
| Forest        | 0.271                            | 0.212       | 0.661    |
| Soil Horizon  | LULC comparisons by Soil Horizon |             |          |
|               | PG vs. LG                        | PG vs. F    | LG vs. F |
| Ap            | 0.723                            | 0.019 (PG)  | 0.339    |
| Bt            | 0.028 (LG)                       | 0.087       | 0.91     |
| BC            | 0.845                            | 0.514       | 0.585    |

**Table S2.** Soil properties and calculated SOC stocks based on pedon measured values from the KSSL.

| Soil Horizon | Horizon Thickness (cm) | Bulk Density (Bd) |                                  | Soil Organic Carbon (SOC) wt% | SOC Stock |                                   |
|--------------|------------------------|-------------------|----------------------------------|-------------------------------|-----------|-----------------------------------|
|              |                        | 33 kPa            | Oven Dried (g cm <sup>-3</sup> ) |                               | 33 kPa    | Oven Dried (Mg ha <sup>-1</sup> ) |
| A            | 0–11                   | 1.29              | 1.3                              | 3.29                          | 46.7      | 47.1                              |
| E            | 11–32                  | 1.86              | 1.87                             | 0.46                          | 18.0      | 22.5                              |
| Bt1          | 32–58                  | 1.69              | 1.72                             | 0.13                          | 5.7       | 5.8                               |
| Bt2          | 58–94                  | 1.71              | 1.79                             | 0.2                           | 12.3      | 12.9                              |
| Bt3          | 94–155                 | 1.62              | 1.62                             | 0.12                          | 11.9      | 11.9                              |
| Bt4          | 155–200                | 1.72              | 1.72                             | 0.06                          | 4.6       | 4.6                               |

**Table S3.** Mean SOC stocks, 90% Confidence Interval (90% CI) and estimated difference between gSSURGO upper values (UV) and lower values (LV).

| Soil Horizon | Prairie Grass          |           |                                     |
|--------------|------------------------|-----------|-------------------------------------|
|              | Horizon Thickness (cm) | SOC Stock | 90% CI Width (Mg ha <sup>-1</sup> ) |
| Ap           |                        | 23.2      | 47.0                                |
| Bt           |                        | 14        | 13.2                                |
| BC           |                        | 20        | 18.6                                |
| Soil Horizon | Lawn Grass             |           |                                     |
|              | Horizon Thickness (cm) | SOC Stock | 90% CI Width (Mg ha <sup>-1</sup> ) |
| Ap           |                        | 23        | 47.9                                |
| Bt           |                        | 27        | 20.4                                |
| BC           |                        | 50+       | 14.1                                |
| Soil Horizon | Forest                 |           |                                     |
|              | Horizon Thickness (cm) | SOC Stock | 90% CI Width (Mg ha <sup>-1</sup> ) |
| Ap           |                        | 21        | 28.9                                |
| Bt           |                        | 29        | 20.9                                |
| BC           |                        | 50+       | 23.0                                |
| KSSL         |                        |           |                                     |

| Soil<br>Horizon | Horizon<br>Thickness<br>(cm) | SOC<br>Stock | gSSURGO<br>UV-LV<br>(Mg ha <sup>-1</sup> ) |     |
|-----------------|------------------------------|--------------|--------------------------------------------|-----|
| A               |                              | 11           | 47.1                                       | 63* |
| E               |                              | 21           | 22.5                                       | 63* |
| Bt1             |                              | 26           | 5.8                                        | 63* |
| Bt2             |                              | 36           | 12.9                                       | na  |
| Bt3             |                              | 61           | 11.9                                       | na  |
| Bt4             |                              | 45           | 4.6                                        | na  |
